# Supplementary material for: Prediction of Graft-Versus-Host Disease in Humans by Donor Gene-Expression Profiling
Source: PLoS Med. 2007 Jan 30;4(1):e23. doi: 10.1371/journal.pmed.0040023 (PMC1796639; doi:10.1371/journal.pmed.0040023)
Supplement: Table S2 — (23 KB XLS) [file pmed.0040023.st002.xls]

## Sheet: Feuil1
Table S2. Genes repressed in GVHD+ relative to GVHD– donors
Array	T-cell sub-population	GVHD type	Acc. Number	Gene
ImmunArray	CD4	aGVHD	NM_006732	FOSB
			NM_002758	MAP2K6
			NM_002575	SERPINB2
			NM_003266	TLR4
		cGVHD	NM_000732	CD3D
			NM_012296	GAB2
			NM_005456	MAPK8IP1
			NM_005631	SMO
		aGVHD & cGVHD	NM_004357	CD151
			NM_001429	EP300
			XM_371575	FNBP3
			NM_000565	IL6R
			NM_004688	NMI
			NM_002611	PDK2
			NM_015568	PPP1R16B
			NM_003035	SIL
			NM_003089	SNRP70
			NM_007271	STK38
			NM_006019	TCIRG1
	CD8	aGVHD	NM_001763	CD1A
			NM_000732	CD3D
			NM_172200	IL15RA
			NM_000206	IL2RG
			NM_181430	ILF1
			NM_014387	LAT
			NM_002412	MGMT
			NM_003263	TLR1
		cGVHD	NM_002927	RGS13
			NM_003246	THBS1
		aGVHD & cGVHD	NM_139205	HDAC5
			NM_138714	NFAT5
			NM_015897	PIAS4
			NM_006019	TCIRG1
H19K	CD4	aGVHD	NM_001119	ADD1
			NM_004281	BAG3
			NM_015897	PIAS4
			NM_003376	VEGF
			NM_003403	YY1
		cGVHD	NM_001626	AKT2
			NM_002569	FURIN
		aGVHD & cGVHD	NM_006885	ATBF1
			NM_053056	CCND1
			NM_021874	CDC25B
			NM_006387	CHERP
			NM_003651	CSDA
			NM_003974	DOK2
			NM_001454	FOXJ1
			NM_000520	HEXA
			NM_013995	LAMP2
			NM_006500	MCAM
			NM_002502	NFKB2
			NM_000958	PTGER4
			NM_006325	RAN
			NM_003721	RFXANK
			NM_005902	SMAD3
			NM_003380	VIM
	CD8	aGVHD	NM_001344	DAD1
			NM_003974	DOK2
			NM_012218	ILF3
			NM_006500	MCAM
			NM_002434	MPG
			NM_003721	RFXANK
			NM_005902	SMAD3
			NM_001066	TNFRSF1B
			NM_003376	VEGF
			NM_003380	VIM
			NM_003403	YY1
		aGVHD & cGVHD	NM_004281	BAG3
			NM_053056	CCND1
			NM_013230	CD24
			NM_021874	CDC25B
			NM_006387	CHERP
			NM_003651	CSDA
			NM_004394	DAP
			NM_001454	FOXJ1
			NM_002569	FURIN
			NM_002124	HLA-DRB3
			NM_001540	HSPB1
			NM_013995	LAMP2
			NM_002502	NFKB2
			NM_002730	PRKACA
			NM_000958	PTGER4
GVHD-predictive genes identified by one-dimensional analyses of data from the ImmunArray and H19K chips. From genes with a T-test p-value ≤ 0.05 and LDA accuracy ≥ 65% (Fig. 2), we listed those that are annotated and have a demonstrated or putative function in T-cell biology.
